# Supplementary material for: Is MCM-41 really advantageous over amorphous silica? The case of grafted titanium epoxidation catalysts
Source: Royal Society of Chemistry journal article supplement (doi:10.1039/b103057b), 2001-01-01
Supplement: b103057b.doc [file b103057b.doc]

**Is MCM-41 really advantageous over amorphous silica? The case of titanium grafted epoxidation catalysts**

José M. Fraile,a José I. García,a José A. Mayoral,a* Eugenio Vispe,a D. R. Brownb and M. Naderib

*a Departamento de Química Orgánica, Instituto de Ciencia de Materiales de Aragón, Facultad de Ciencias, Universidad de Zaragoza-C.S.I.C., E-50009 Zaragoza (Spain).*

*b Department of Chemical and Biological Sciences, University of Huddersfield, Huddersfield HD1 3DH (UK).*

**Supplementary Information**

**Preparation and characterisation of the catalysts**

Pure siliceous MCM-41was prepared1 by addition of Cab-O-Sil fused silica on an aqueous solution of tetramethylammonium hydroxide (TMAOH) and cetyltrimethylammonium bromide (CTABr) at room temperature. The ratio in the mixture was SiO2:TMAOH:CTABr:H2O=1.0:0.19:0.27:40. After 24 h aging, the gel was heated in an autoclave for 48 h at 423 K. The solid was filtered, washed with water, dried in air at 373 K and calcined at 823 K for 8h. The structure was confirmed by XRD. MCM-Ti(OiPr) and Si-Ti(OiPr) were prepared from MCM-41 and Merck 60 silica, respectively, pretreated at 413 K under vacuum overnight. Treatment was carried out with a solution of Ti(OiPr)4 in toluene under reflux (Scheme 1).2

Si-Ti(OiPr) had been characterised by MAS-NMR,2 EXAFS3 and IR.4 The presence of isopropoxy groups was detected by NMR and IR. On the other hand EXAFS showed the presence of tetrahedral titanium with two different Ti-O distances. All these results pointed to existence of the species represented in Scheme 1. The similarity of the IR spectra of the solids in the regions of 1700-1300 cm-1 (Figure 1) and 3000-2800 cm-1 (not shown), together with the agreement observed in the titanium loading seem to indicate that the surface species are similar irrespective from the structure of the silica.

In the IR spectra of the recovered catalysts (Figure 2) similar bands are present irrespective from the type of support. A broad band between 1750 and 1550 cm-1, accompanied with bands in the range 1450-1350 cm-1 show that some by-products remain adsorbed on the surface, but these bands are not sufficient to identify them.

**Figure 1** IR spectra of the freshly prepared catalysts: A) with isopropoxy groups: a) Si-Ti(OiPr) and b) MCM-Ti(OiPr); B) with tartaric acid: a) Si-Ti(TA) and b) MCM-Ti(TA).

**Figure 2** IR spectra of the recovered catalysts after three epoxidation reactions of cyclohexene with H2O2: A) with isopropoxy groups: a) Si-Ti(OiPr) and b) MCM-Ti(OiPr); B) with tartaric acid: a) Si-Ti(TA) and b) MCM-Ti(TA).

**Epoxidation of cyclohexene with TBHP**

**Table 2** Results obtained in the epoxidation of cyclohexene with TBHP in the presence of titanium catalysts.*a*

|  |  |  | 1 h |  |  | 24 h |  |
| --- | --- | --- | --- | --- | --- | --- | --- |
| Catalyst | TBHP/Ti | yield | TON | select*b* | yield | TON | select*b* |
| Si-Ti(OiPr) | 42.1 | 35.1 | 14.8 | 89.8 | 82.6 | 34.8 | 99.7 |
| MCM-Ti(OiPr) | 36.0 | 39.0 | 14.0 | 89.6 | 85.9 | 30.9 | 99.9 |
| Si-Ti(TA) | 45.5 | 3.5 | 1.6 | 91.4 | 40.3 | 18.3 | 99.8 |
| MCM-Ti(TA) | 44.6 | 1.6 | 0.7 | 99.5 | 26.6 | 11.9 | 99.9 |

*a* Reaction conditions: 200 mg catalyst, 18 mmol cyclohexene, 9 mmol TBHP (3M, isooctane), 4 mL dichloromethane, room temperature, Ar atmosphere, 24 h. Epoxide is the only product. *b* yield epoxide/conversion TBHP.

**References**

1 C. F. Cheng, D. H. Park, J. Klinowski, *J. Chem. Soc. Faraday Trans.*, 1997, **93**, 193.

2 J. M. Fraile, J. I. García, J. A. Mayoral, L. C. de Mènorval, F. Rachdi, *J. Chem. Soc., Chem. Commun.*, 1995, 539; C. Cativiela, J. M. Fraile, J. I. García, J. A. Mayoral, *J. Mol. Catal. A*, 1996, **112**, 259.

3 J. M. Fraile, J. García, J. A. Mayoral, M. G. Proietti, M. C. Sánchez, *J. Phys. Chem*., 1996, **100**, 19484.

4 J. M. Fraile, J. I. García, J. A. Mayoral, E. Vispe, *J. Catal.*, 2000, **189**, 40.
